# Supplementary material
Source: publisher figshare collection journal article supplement (https://frontiersin.figshare.com/ndownloader/files/21725544)
Supplement: Supplementary file [file 21725544]

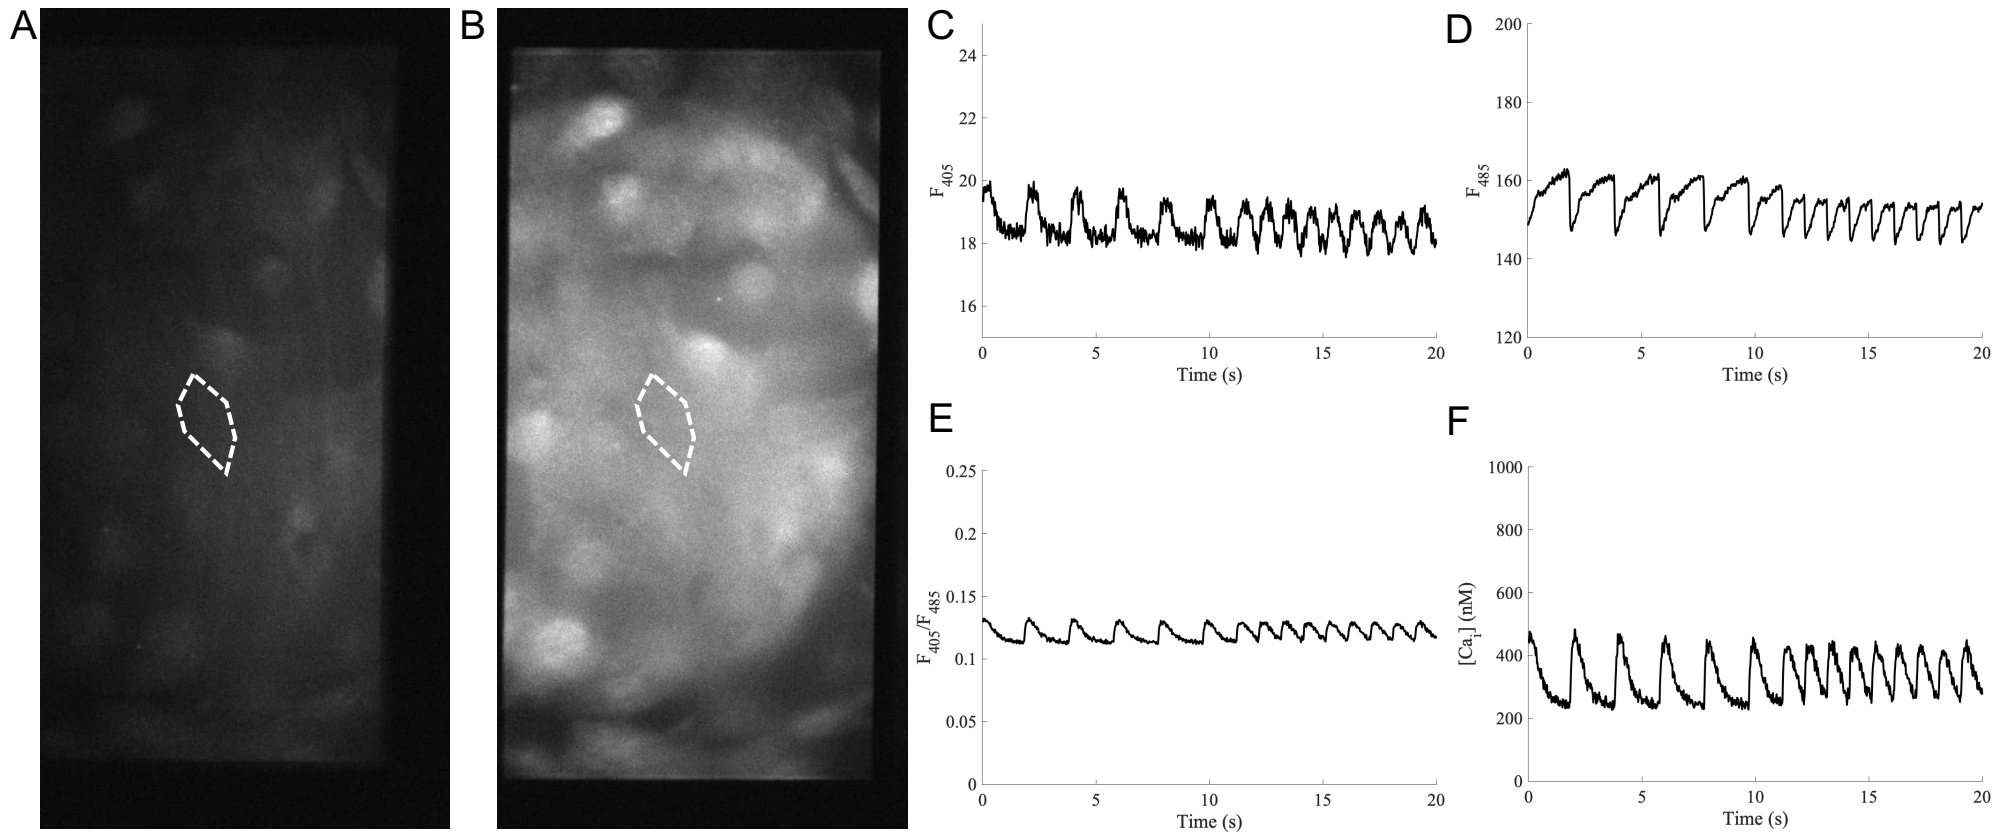

Figure S1. Image processing and analysis for pacing protocol. (A)  $F_{405}$  and (B)  $F_{485}$  image. (C)  $F_{405}$  transient extracted from single-cell ROI indicated by white dashed line in (A). (D)  $F_{485}$  transient from same ROI applied to (B). (E)  $F_{405}/F_{485}$  transient. (F)  $[Ca^{2+}]_i$  calculated from (E) after calibration. All signals shown are after subtraction of camera background ( $F_{bg}$ ) and cell autofluorescence ( $F_{cell}$ ).

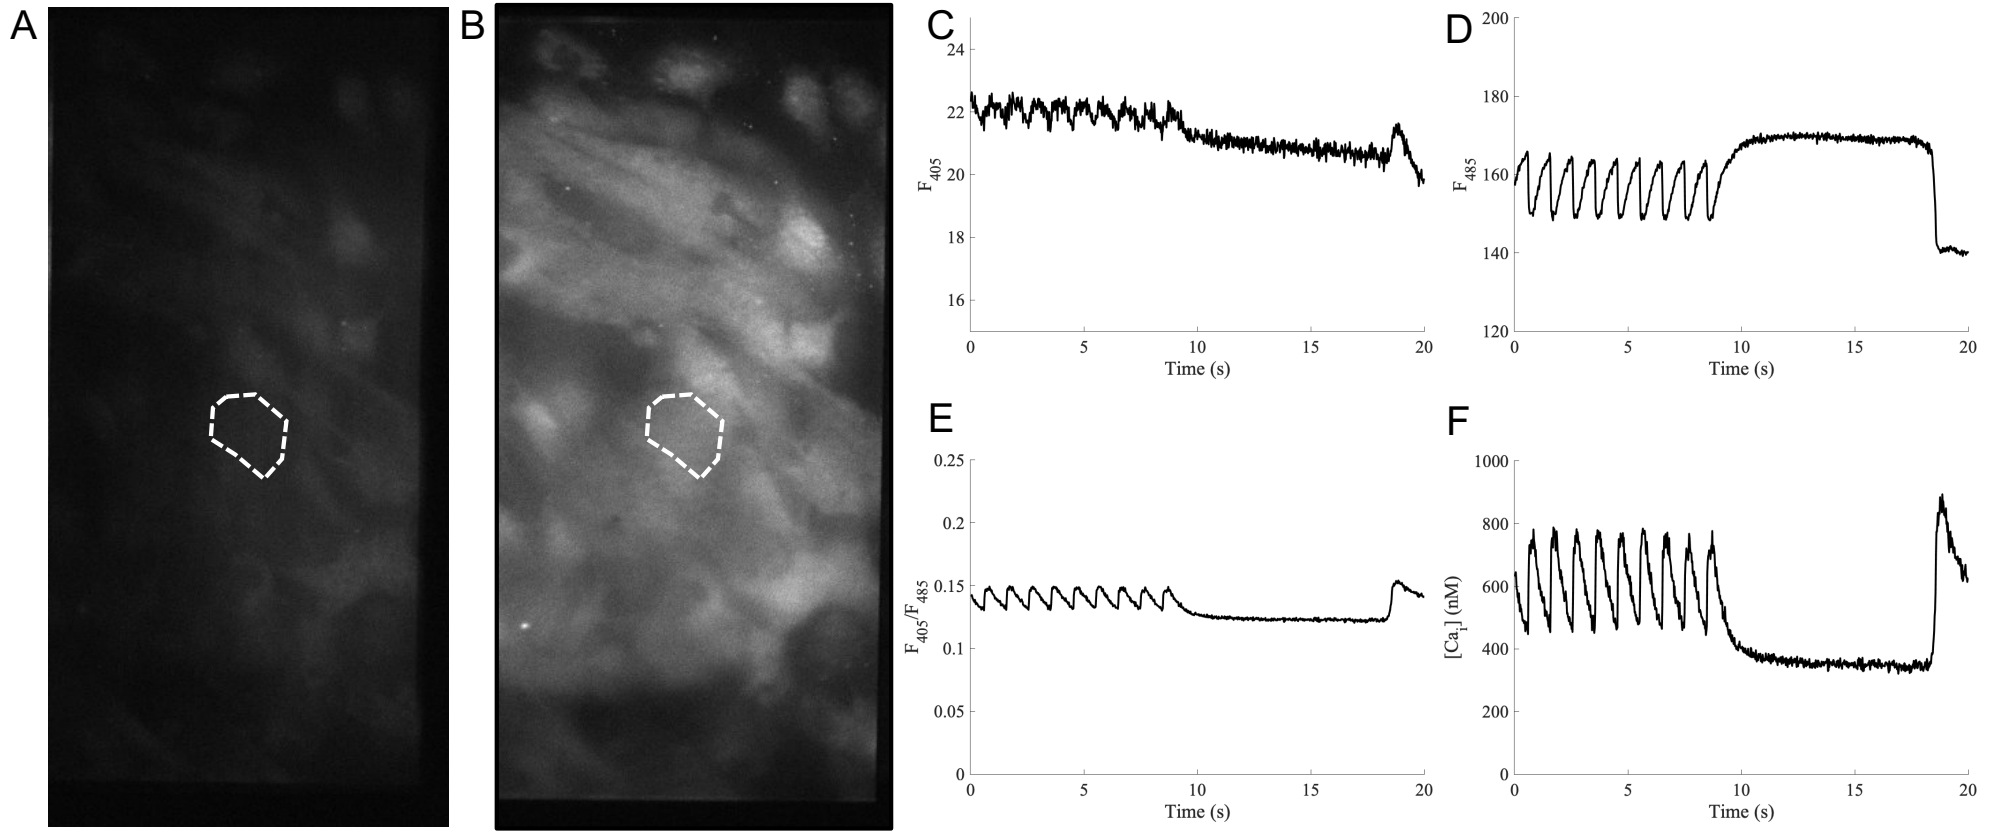

Figure S2. Image processing and analysis for protocol with caffeine application. (A)  $F_{405}$  and (B)  $F_{485}$  image. (C)  $F_{405}$  transient extracted from single-cell ROI indicated by white dashed line in (A). (D)  $F_{485}$  transient from same ROI applied to (B). (E)  $F_{405}/F_{485}$  transient. (F)  $[Ca^{2+}]_i$  calculated from (E) after calibration. All signals shown are after subtraction of camera background ( $F_{bg}$ ) and cell autofluorescence ( $F_{cell}$ ).

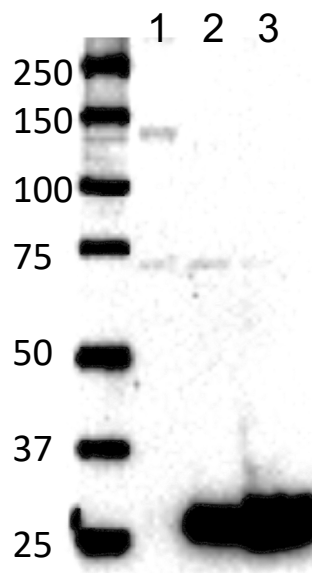

Figure S3. Contrast-enhanced western blot for Fig. 1E. Cells infected with TRPC6-eGFP (lane 1), eGFP (lane 2), and shRNA-TRPC6-eGFP (lane 3) were probed with anti-eGFP antibody at 10 second exposure. For TRPC6-eGFP cells, a band was detected at ~135 kDa, that was not present for eGFP and shRNA-TRPC6-eGFP cells. For eGFP and shRNA-TRPC6-eGFP cells, a band was detected at ~30 kDa, that was not present for TRPC6-eGFP cells.

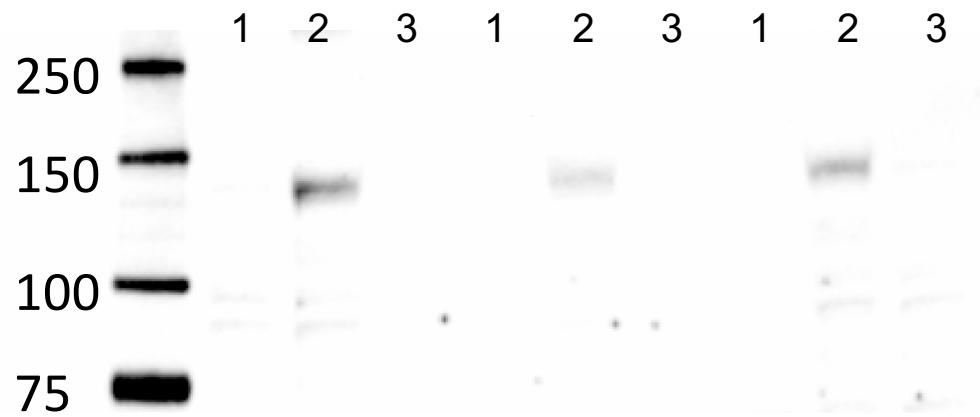

Figure S4. Western blot for anti-TRPC6 antibody LS-C19628 labeling NRVMs expressing eGFP (1), TRPC6-eGFP (2), and shRNA-TRPC6-eGFP (3). LS-C19628 identifies TRPC6-eGFP expression by a band ~135 kDa.

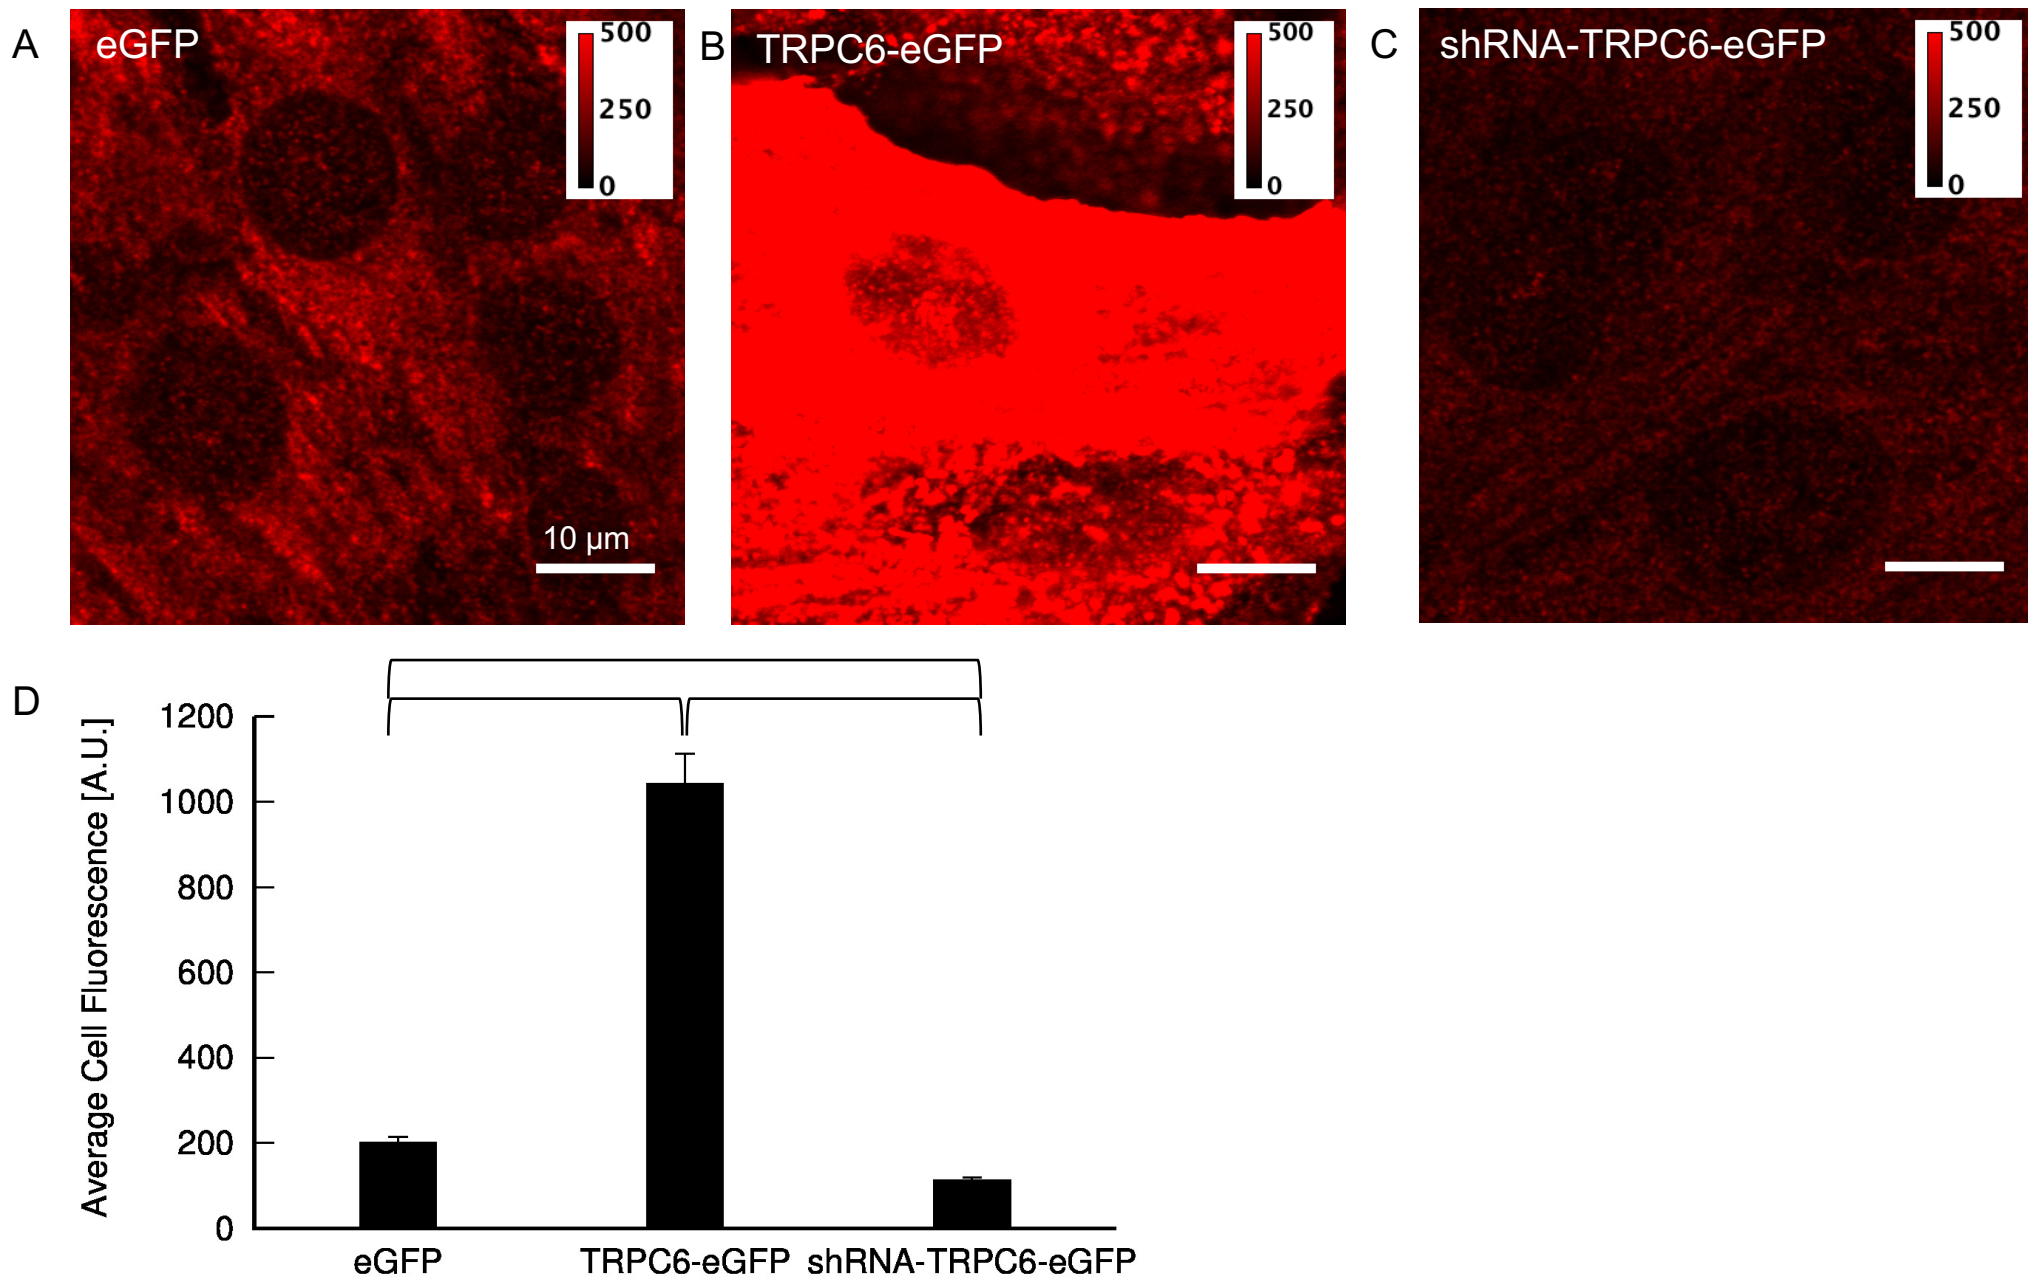

Figure S5. Brightness-adjusted images of anti-TRCP6 LS-C19628 labeling in (A) eGFP, (B) TRPC6-eGFP, and (C) shRNA-TRPC6-eGFP groups shown in Fig 2B, F, and J. (D) Fluorescence from anti-TRCP6 LS-C19628 labeling in NRVMs infected with eGFP, TRPC6-eGFP, and shRNA-TRPC6-eGFP.

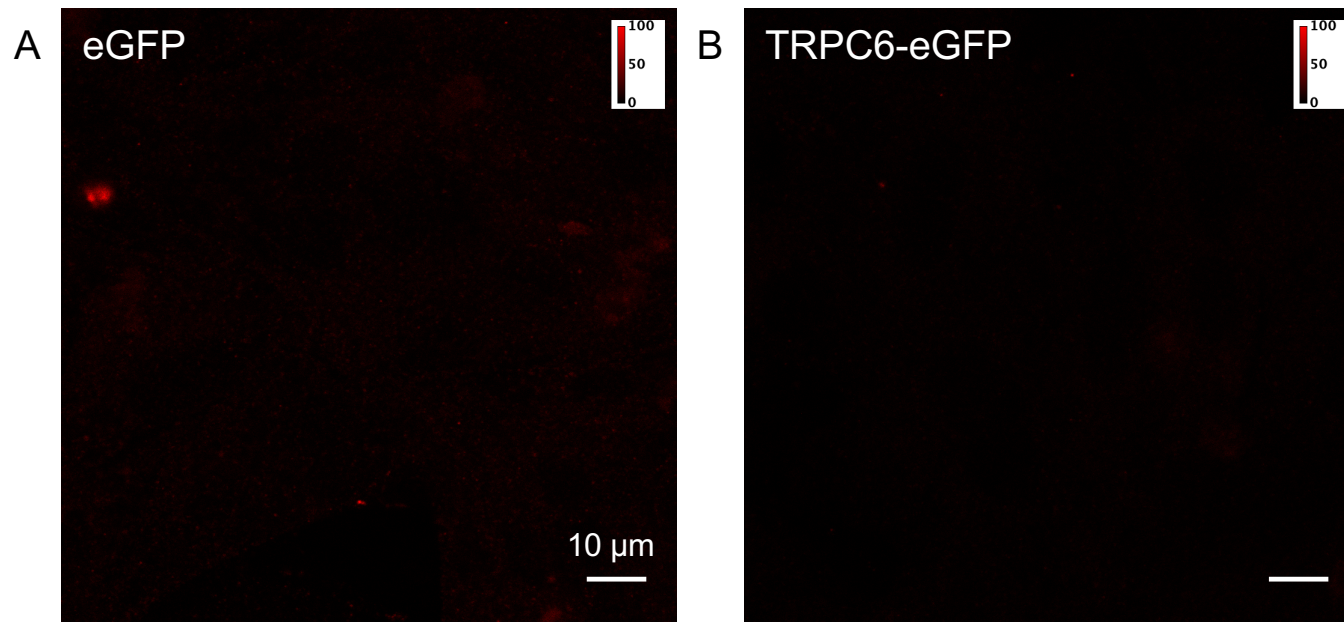

Figure S6. Images of secondary antibody only for (A) eGFP and (B) TRPC6-eGFP cells. Only marginal fluorescence was detected.

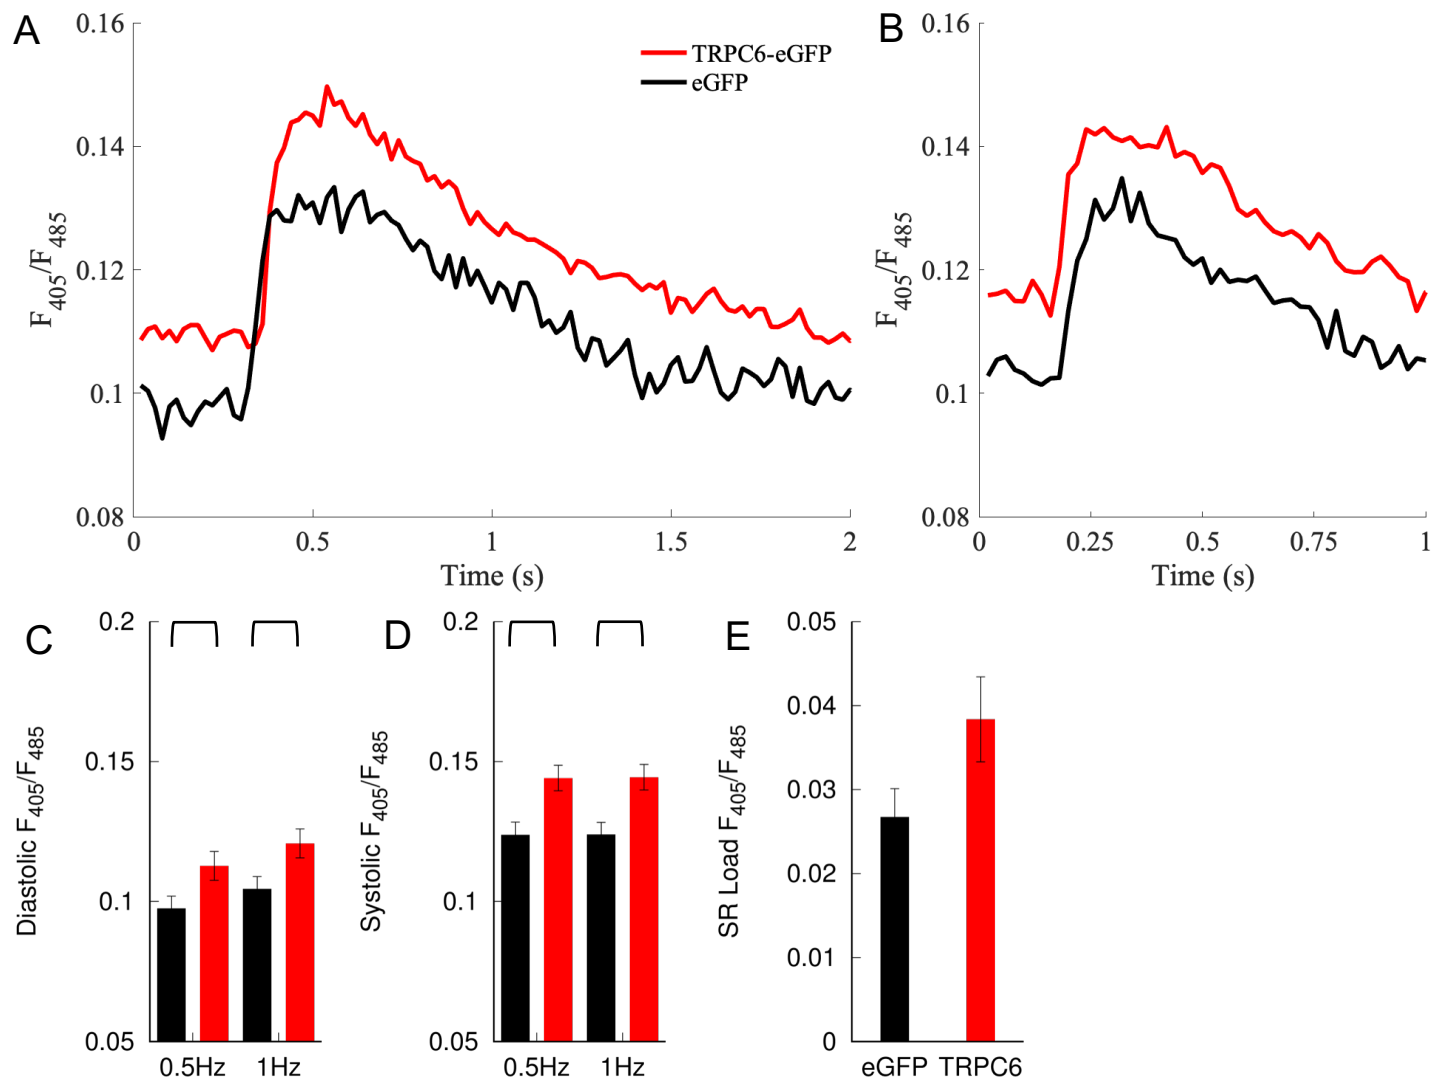

Figure S7.  $F_{405}/F_{485}$  for eGFP and TRPC6-eGFP. Example traces for each group with pacing at (A) 0.5 Hz and (B) 1 Hz. (C) Diastolic and (D) systolic  $F_{405}/F_{485}$  at each pacing rate. Both diastolic and systolic  $F_{405}/F_{485}$  increased at 0.5 and 1 Hz ( $P < 0.05$ ). (E) Amplitude of  $F_{405}/F_{485}$  for caffeine-induced SR load measurement.

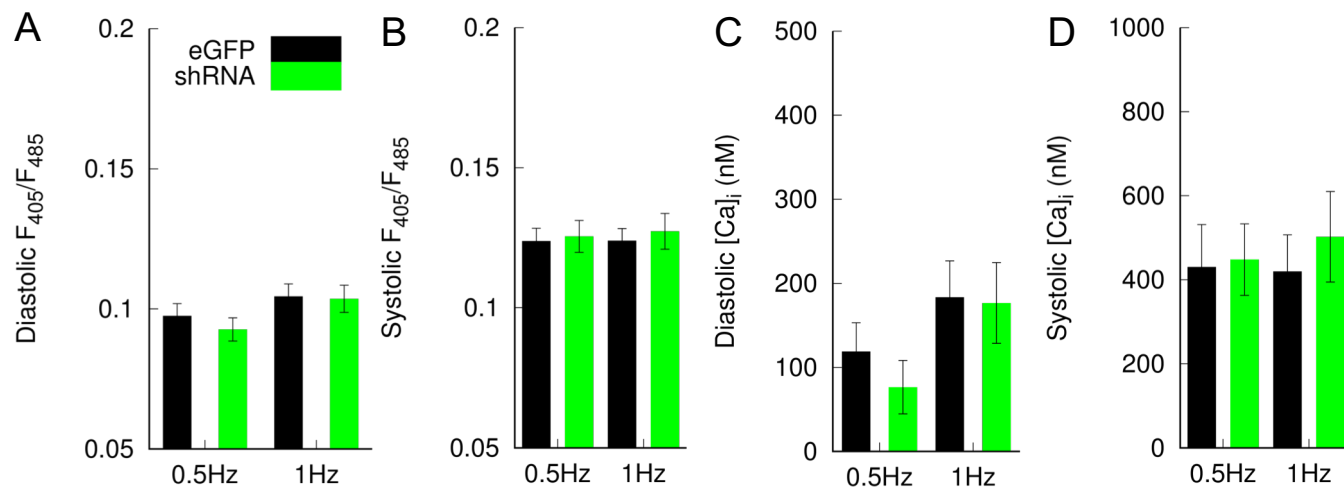

Fig S8. Assessment of native TRPC6 activity in NRVMs. Application of shRNA-TRPC6 to silence native TRPC6 did not yield significant differences in (A) diastolic or (B) systolic indo-1 ratios, at both 0.5 and 1 Hz pacing versus control ( $P > 0.05$ ). (C) Diastolic and (D) systolic  $[Ca^{2+}]_i$  were not significantly different, suggesting marginal native TRPC6 contribution in NRVMs.



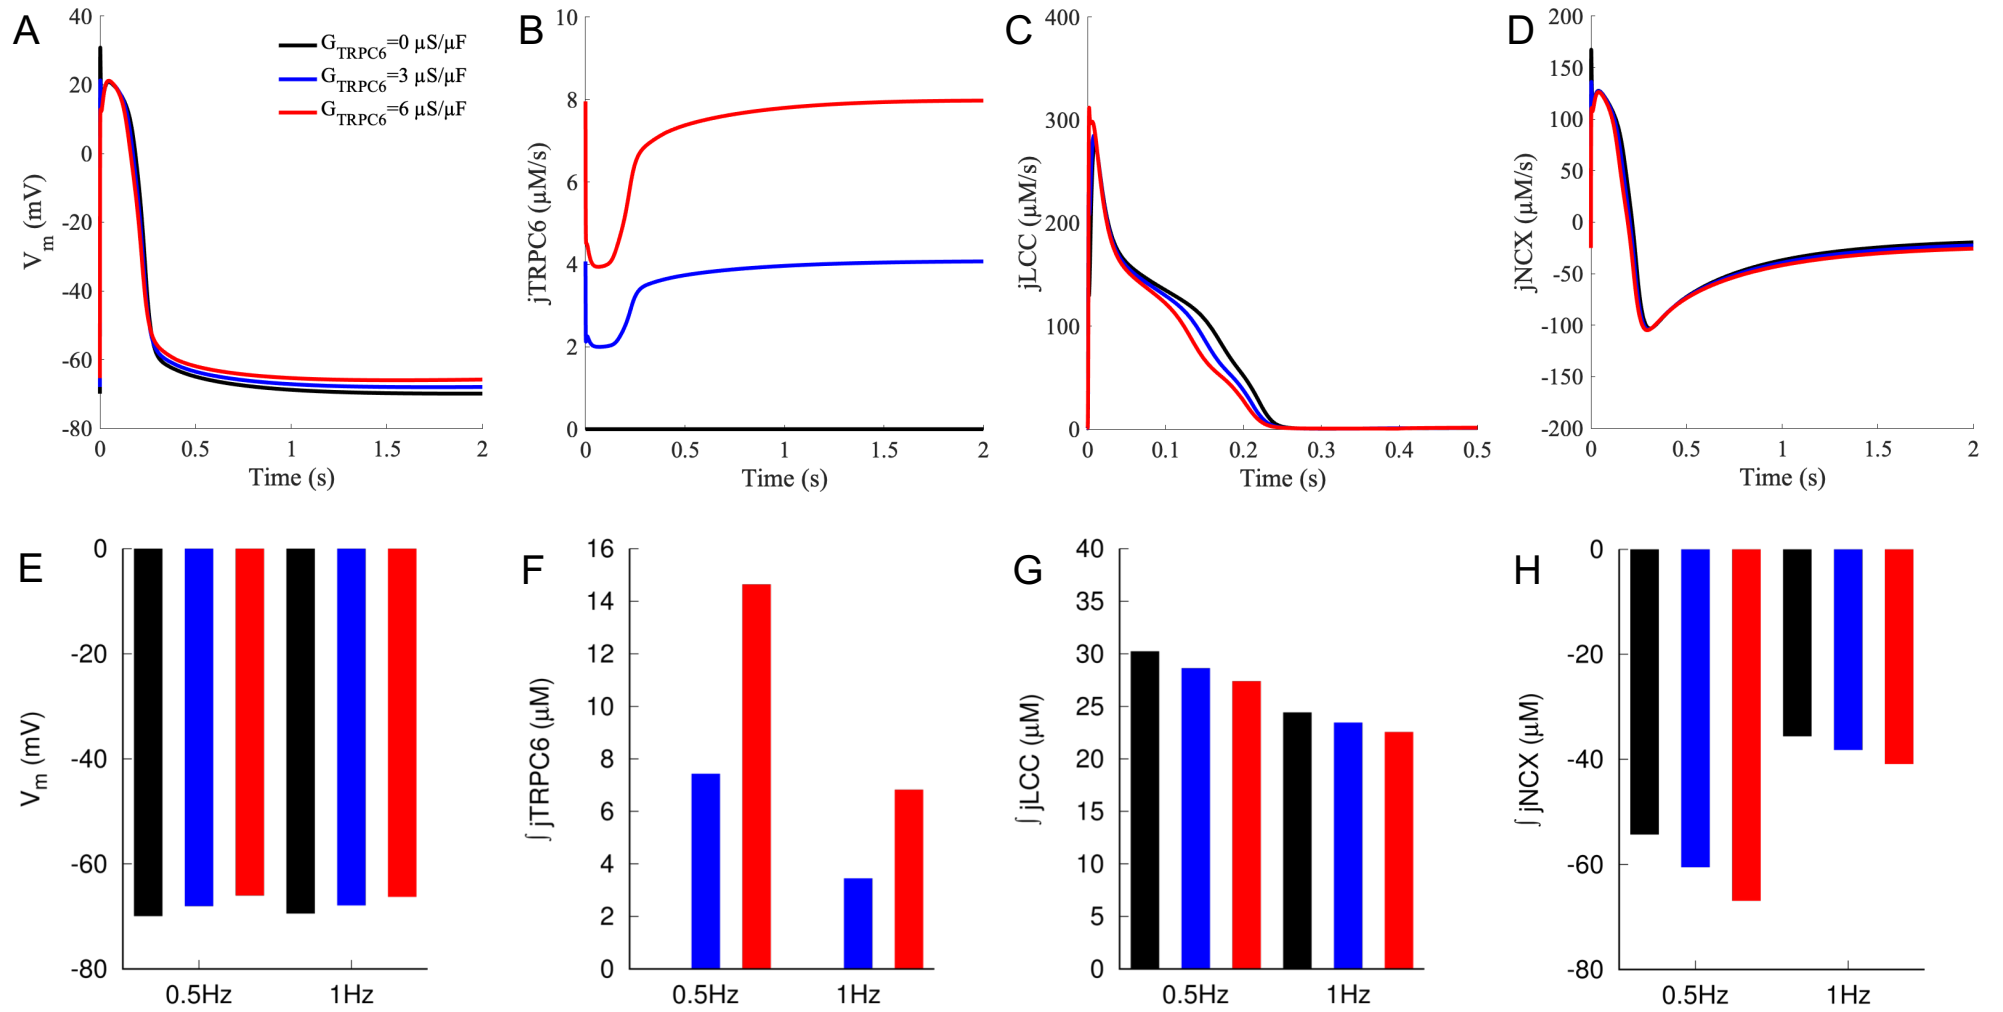

Fig S9. Simulation of NRVM electrophysiology and calcium signaling with TRPC6 modeled as sarcolemmal leak with  $G_{TRPC6}$  of 0, 3 and 6  $\mu S/\mu F$ . (A)  $V_m$  in response to 0.5 Hz stimulation. Increased  $G_{TRPC6}$  decreased  $V_m$ . (B)  $Ca^{2+}$  flux through TRPC6. (C) L-type  $Ca^{2+}$  channel flux. Data are for first 0.5 s to show decrease of sarcolemmal channel activity with increased  $G_{TRPC6}$ . (D)  $Ca^{2+}$  flux through NCX channels. Negative values indicate forward mode of NCX. (E) Resting  $V_m$  increased for increasing  $G_{TRPC6}$  for 0.5 Hz and 1 Hz stimulation. (F)  $Ca^{2+}$  influx through TRPC6 is increased with increased  $G_{TRPC6}$ . (G)  $Ca^{2+}$  influx through LCC decreased with increased  $G_{TRPC6}$ . (H) Increased  $G_{TRPC6}$  led to an increased  $Ca^{2+}$  extrusion through NCX.

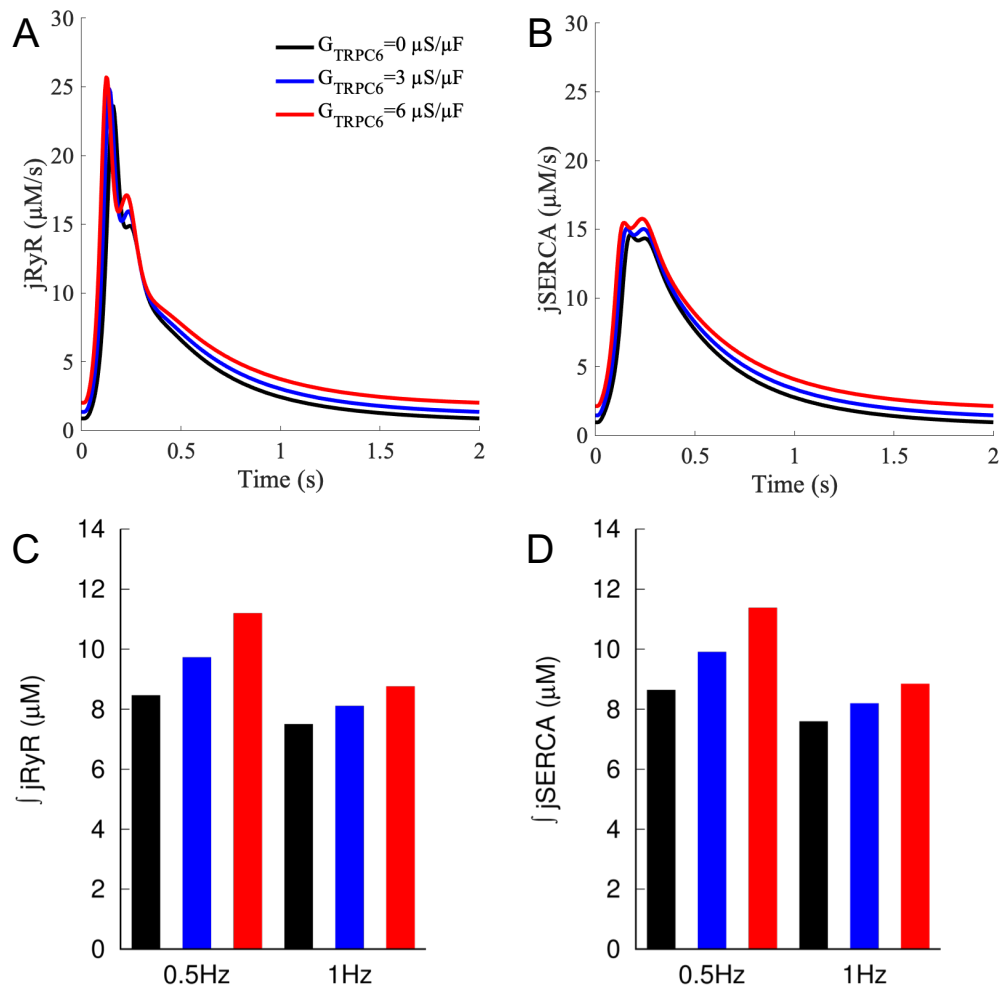

Fig S10. Simulation of SR  $\text{Ca}^{2+}$  dynamics in NRVM for  $G_{\text{TRPC6}}$  of 0, 3, and 6  $\mu\text{S}/\mu\text{F}$ . (A)  $\text{Ca}^{2+}$  flux through RyRs for 0.5 Hz stimulation. RyR  $\text{Ca}^{2+}$  release is increased with increased  $G_{\text{TRPC6}}$ . (B)  $\text{Ca}^{2+}$  uptake through SERCA increases with increased  $G_{\text{TRPC6}}$ . (C) RyR release into the cytosol increased with increased  $G_{\text{TRPC6}}$ . (D) SERCA  $\text{Ca}^{2+}$  uptake increased with increased  $G_{\text{TRPC6}}$ .

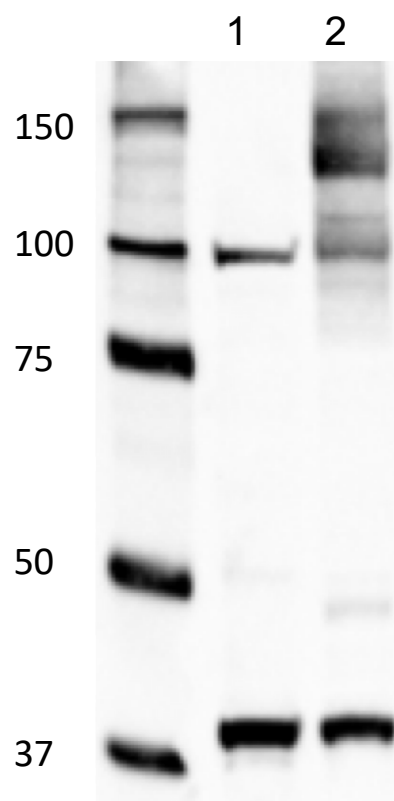

Figure S11. Western blot using anti-TRPC6 antibody AB-105845 for NRVMs infected with eGFP (lanes 1) and TRPC6-eGFP (lanes 2). AB-105845 identified marginal native TRPC6 expression by a weak band at ~100 kDa and strong TRPC6-eGFP expression by a band at ~135 kDa.
